# Supplementary material for: In-vitro and In-silico approach for characterization of antimicrobial-peptide from probiotics against Staphylococcus aureus and Escherichia coli
Source: Research Square preprint supplement (doi:10.21203/rs.3.rs-366314/v1), 2021-04-21
Supplement: Supplementary file 1 [file 42fd1ea6de676316f95be928.docx]

***In-vitro* and *In-silico* approach for characterization of antimicrobial-peptide from probiotics against *Staphylococcus aureus* and *Escherichia coli***

Amrutha Bindu and *Lakshmidevi N

DOS in Microbiology, Manasa Gangothri, University of Mysore, Mysore

*Corresponding Author:

Dr. Lakshmidevi N

Professor

DOS in Microbiology, Manasa Gangothri, University of Mysore, Mysore-570 005

Phone: 080 2419735; Mobile: +91 9008177435


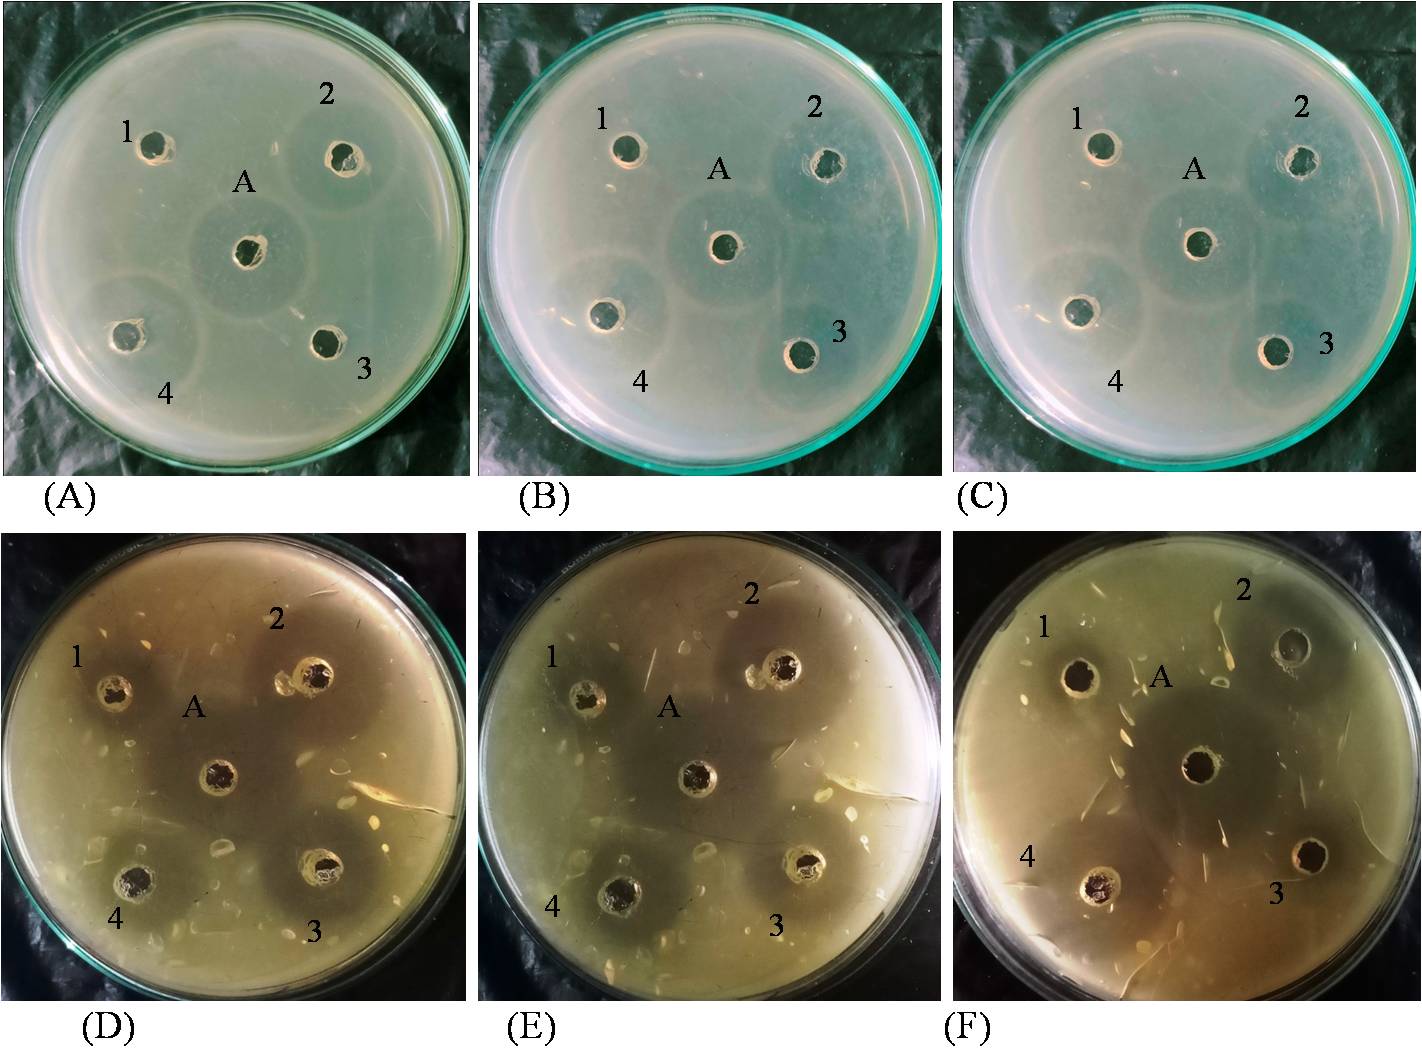


**Fig. S1** Antimicrobial activity of bacteriocin extracted with different methods. (1) Ethanol precipitation; (2) Chloroform extraction; (3) Butanol extraction; (4) Ammonium sulphate precipitation and dialysis. Inhibitory activity against *S. aureus* by (A) DB-1aa; (B) Cu2-PM7; (C) Cu3-PM8. Inhibitory activity against *E. coli* by (D) DB-1aa; (E) Cu2-PM7; (F) Cu3-PM8. ‘A’ indicate positive control (Chlorampenicol-1 mg/ml).


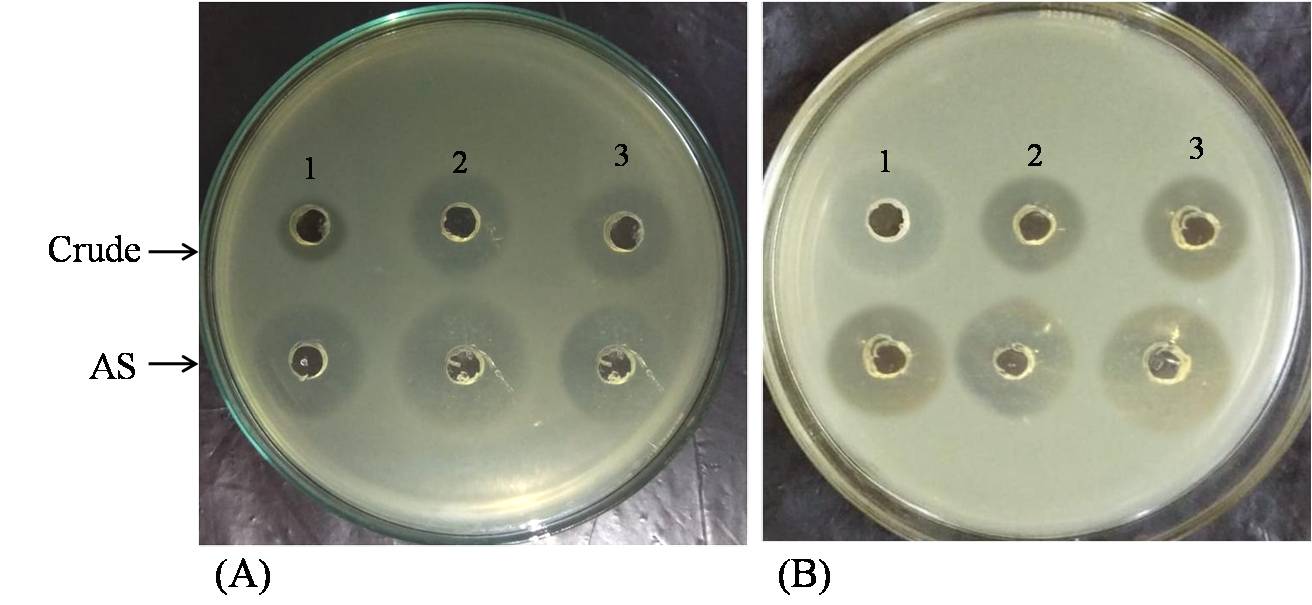


**Fig. S2** Inhibitory activity of crude and Ammonium sulphate precipitated (AS) against (A) *S. aureus*; (B) *E. coli*. (1) *E. durans* DB-1aa; (2) *L. plantarum* Cu2-PM7; (3) *L. fermentum* Cu3-PM8
